# Supplementary material for: A laboratory experiment on the behaviour of soil-derived core and intact polar GDGTs in aquatic environments
Source: Copernicus journal article supplement (doi:10.5194/bg-12-933-2015), 2015-02-16
Supplement: Supplementary file 1 [file bg-12-933-2015-supplement.zip]

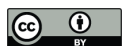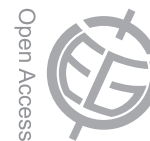

## *Supplement of*

# **A laboratory experiment on the behaviour of soil-derived core and intact polar GDGTs in aquatic environments**

**F. Peterse et al.**

*Correspondence to:* F. Peterse ([f.peterse@uu.nl](mailto:f.peterse@uu.nl))

- [bg-12-933-2015-supplement-cover-letter.pdf](#)
- [NZ\\_IncExp\\_SI\\_final.xlsx](#)
- [\\_\\_MACOSX](#)
  - [.\\_NZ\\_IncExp\\_SI\\_final.xlsx](#)
