# Supplementary material for: A laboratory experiment on the behaviour of soil-derived core and intact polar GDGTs in aquatic environments
Source: Copernicus journal article supplement (doi:10.5194/bg-12-933-2015), 2015-02-16
Supplement: Supplementary file 1 [file NZ_IncExp_SI_final.xlsx]

## Sheet: Ocean water
Ocean water	Core lipids (+carry over) ng/g dry weight soil
Incubation time (days)	brGDGT-IIIa	brGDGT-IIIb	brGDGT-IIIc	brGDGT-IIa	brGDGT-Iib	brGDGT-Iic	brGDGT-Ia	brGDGT-Ib	brGDGT-Ic	cren	cren'	isoGDGT-0	isoGDGT-1	isoGDGT-2	isoGDGT-4		BIT	MBT'	CBT	TEX86
0	55.5603	0	0	107.898	5.93563	0.280118	41.613	5.25777	0.503199	30.5986	0.898003	7.4485	2.73209	3.01503	1.46514		0.870163	0.218265	1.12571	0.663132
0	51.4057	0	0	100.951	5.56447	0.246076	38.3518	4.85663	0.492803	25.2027	0.932315	6.25722	2.36044	2.43354	1.21706		0.883273	0.216484	1.12605	0.660043
1	41.2288	0	0	79.3318	4.48109	0.231503	30.334	3.98771	0.453206	23.6353	0.759416	6.17863	2.20552	2.29038	1.1022		0.864577	0.217278	1.11225	0.653084
1	57.9237	0	0	111.471	6.5536	0.32367	42.6063	5.56307	0.618514	32.9679	1.52747	8.62991	3.11657	3.1313	1.66731		0.86542	0.216777	1.10436	0.669947
7	48.8982	0	0	95.0705	5.22121	0.257506	36.1006	4.65484	0.511029	26.1127	0.974807	6.6813	2.48252	2.47354	1.39371		0.873351	0.216379	1.12325	0.66107
7	65.4552	0	0	128.405	7.17202	0.327887	48.0091	6.01724	0.737726	35.6601	1.09401	9.07701	3.26992	3.3259	1.79365		0.871509	0.213818	1.12631	0.655198
14	52.4128	0	0	101.033	5.56565	0.260436	39.0844	4.99085	0.566898	31.4537	1.29556	7.7796	3.0105	3.38031	1.53386		0.859572	0.218926	1.12297	0.67349
14	50.8594	0	0	99.0493	5.58734	0.270545	37.9037	4.78653	0.445611	28.6594	1.14533	7.25207	2.71323	2.84356	1.49571		0.867607	0.216869	1.12063	0.669031
30	44.012	0	0	87.0376	4.99407	0.273981	33.3426	4.0979	0.475128	25.303	0.90423	6.52428	2.51924	2.69227	1.28056		0.866612	0.217614	1.1219	0.659392
30	72.9063	0	0	143.535	8.28524	0.379141	54.6685	6.80674	0.848484	42.006	1.5364	10.659	4.06989	4.03906	2.12126		0.865845	0.216832	1.11836	0.654115
91	42.0725	0	0	82.7506	4.48627	0.197378	30.8052	4.11064	0.403012	24.5633	1.09952	7.26627	2.34787	2.49187	1.23958		0.863682	0.21428	1.12087	0.672946
91	57.5322	0	0	111.216	6.10304	0.291666	41.4784	5.00383	0.570004	46.1718	1.37163	17.7741	5.14621	3.71526	1.97831		0.819921	0.211761	1.13823	0.578574
152	49.82	0	0	96.0479	5.29564	0.281688	36.3162	4.653	0.573979	42.0556	0.910563	16.6017	3.89343	3.4147	1.57086		0.812453	0.215262	1.12401	0.602287
152	55.4501	0	0	107.713	5.9595	0.305813	40.1131	4.90432	0.614509	51.4161	1.32605	23.0088	5.48071	3.86152	1.99086		0.798125	0.212182	1.13377	0.567055
	Intact polar-derived lipids (-carry over) ng/g dry weight soil
0	7.18917	0	0	16.4466	0	0	7.17009	0	0	33.6908	2.50375	17.2947	8.25254	9.13507	4.2334		0.477635	0.232751	n.d.	0.657923
0	6.17146	0	0	15.3258	0	0	6.35579	0	0	29.4969	2.31455	16.0255	6.78751	7.73121	3.82		0.485668	0.22819	n.d.	0.671359
1	5.73067	0	0	13.3601	1.45842	0	5.39876	-0.0981969	0	33.5071	2.653	15.151	7.22211	8.39455	4.22951		0.422258	0.205052	n.d.	0.679005
1	8.09238	0	0	19.7265	1.72281	0	7.87914	-0.167352	0	59.2215	4.52261	23.5398	11.835	15.0731	7.83586		0.376087	0.207009	n.d.	0.698598
7	5.23241	0	0	12.2631	1.29376	0	4.95771	-0.105621	0	32.3423	2.89377	15.3771	7.33546	8.67668	4.54638		0.409764	0.205237	n.d.	0.687218
7	5.50594	0	0	14.0028	-0.119409	0	6.17958	-0.0893406	0	37.7992	3.44066	16.8555	8.23784	9.54284	5.5362		0.40462	0.239024	n.d.	0.69213
14	7.98698	0	0	18.7381	0	0	7.95685	-0.109825	0	61.6882	4.72742	23.1608	11.5873	14.1656	7.86995		0.359883	0.226976	n.d.	0.697856
14	7.36578	0	0	17.2775	-0.153618	0	6.4398	-0.172148	0	42.4519	3.76899	20.6495	10.2187	10.8492	6.04245		0.422698	0.203777	n.d.	0.669077
30	7.79207	0	0	17.2258	0	0	6.39473	0	0	45.0286	3.96419	20.1697	9.81415	11.1689	5.7915		0.410938	0.203572	n.d.	0.680723
30	8.84559	0	0	18.3877	0	0	7.43415	0	0	56.3309	4.88039	26.959	13.1459	15.112	8.36035		0.380968	0.214442	n.d.	0.683221
91	5.14171	0	0	12.846	0	0	5.40244	0	0	33.9099	2.86047	16.5328	6.82927	7.79253	4.48696		0.408205	0.230971	n.d.	0.689144
91	8.24071	0	0	18.3648	0	0	7.16259	0	0	81.8695	5.94176	35.8268	14.959	18.1613	9.18718		0.292017	0.212111	n.d.	0.689963
152	7.11953	0	0	14.8826	0	0	5.71807	0	0	50.9934	3.91548	27.8382	12.3493	13.4511	6.9208		0.352166	0.206278	n.d.	0.662924
152	7.77484	0	0	17.458	0	0	6.93099	0	0	59.977	4.72504	28.2352	11.5169	13.2681	6.13879		0.349073	0.21549	n.d.	0.676934

## Sheet: Control
Control (distilled water)	Core lipids (+carry over) ng/g dry weight soil
Incubation time (days)	brGDGT-IIIa	brGDGT-IIIb	brGDGT-IIIc	brGDGT-IIa	brGDGT-Iib	brGDGT-Iic	brGDGT-Ia	brGDGT-Ib	brGDGT-Ic	cren	cren'	isoGDGT-0	isoGDGT-1	isoGDGT-2	isoGDGT-4		BIT	MBT'	CBT	TEX86
0	55.5603	0	0	107.898	5.93563	0.280118	41.613	5.25777	0.503199	30.5986	0.898003	7.4485	2.73209	3.01503	1.46514		0.870163	0.218265	1.12571	0.663132
0	51.4057	0	0	100.951	5.56447	0.246076	38.3518	4.85663	0.492803	25.2027	0.932315	6.25722	2.36044	2.43354	1.21706		0.883273	0.216484	1.12605	0.660043
91	77.355	0	0	165.758	9.16205	0.301167	58.0048	6.19118	0.596861	53.7981	2.48037	13.2598	5.90408	7.3935	3.27053		0.84842	0.204156	1.16359	0.69005
91	65.4244	0	0	131.906	6.80283	0.339628	47.53	5.66555	0.547367	48.455	1.93543	12.3157	5.48822	6.08699	2.97863		0.834802	0.208132	1.1581	0.667164
152	52.9322	0	0	110.5	6.51216	0.193573	40.2535	4.40475	0.455111	48.7662	2.42533	12.4141	5.31463	6.21005	3.00762		0.80683	0.209585	1.14017	0.686594
152	84.2768	0	0	189.424	9.00154	0.260476	81.0399	6.10513	0.498129	52.7415	2.43205	11.8236	5.15164	5.29989	2.93004		0.870567	0.236486	1.25294	0.674228
	Intact polar-derived lipids (-carry over) ng/g dry weight soil
0	7.18917	0	0	16.4466	0	0	7.17009	0	0	33.6908	2.50375	17.2947	8.25254	9.13507	4.2334		0.477635	0.232751	n.d.	0.657923
0	6.17146	0	0	15.3258	0	0	6.35579	0	0	29.4969	2.31455	16.0255	6.78751	7.73121	3.82		0.485668	0.22819	n.d.	0.671359
91	7.83252	0	0	20.1405	0	0	9.37774	0	0	33.3787	2.41803	16.0652	7.21243	8.01247	3.36441		0.528079	0.251073	n.d.	0.656671
91	10.9477	0	0	30.0759	0	0	12.6652	0	0	43.306	3.45968	23.3261	10.8149	12.913	5.80248		0.553522	0.235901	n.d.	0.672177
152	7.06074	0	0	20.3425	0	0	9.56451	0	0	27.9034	2.21062	15.0456	6.81964	7.63425	3.40439		0.569864	0.258726	n.d.	0.660189
152	6.40886	0	0	18.7363	0	0	11.4747	0	0	29.9687	2.57184	16.284	7.05115	8.71369	3.48791		0.549942	0.313346	n.d.	0.676917

## Sheet: SPM
Relative abundance (%) of branched and isoprenoid GDGTs in SPM
	brGDGT-IIIa	brGDGT-IIIb	brGDGT-IIIc	brGDGT-IIa	brGDGT-Iib	brGDGT-Iic	brGDGT-Ia	brGDGT-Ib	brGDGT-Ic	cren	cren'	isoGDGT-0	isoGDGT-1	isoGDGT-2	isoGDGT-4		BIT	MBT'	CBT	TEX86
Ocean SPM	20.4122	0	0	36.8452	9.14754	0	23.372	10.2231	0	45.7274	0.557256	46.6675	4.47616	1.72698	0.844606		0.638109	0.335951	0.492576	0.411419
River SPM	64.7237	0	0	18.9673	2.7653	0.45359	10.8396	1.82726	0.423233	25.0474	0	62.2207	7.25634	5.4755	0		0.790535	0.130901	0.812261	0.430064

## Sheet: River water
Peterse et al., Probing the fate of soil-derived core and intact polar GDGTs in aquatic environments
River water	Core lipids (+carry over) ng/g dry weight soil
Incubation time (days)	brGDGT-IIIa	brGDGT-IIIb	brGDGT-IIIc	brGDGT-IIa	brGDGT-Iib	brGDGT-Iic	brGDGT-Ia	brGDGT-Ib	brGDGT-Ic	cren	cren'	isoGDGT-0	isoGDGT-1	isoGDGT-2	isoGDGT-3		BIT	MBT'	CBT	TEX86
0	55.5603	0	0	107.898	5.93563	0.280118	41.613	5.25777	0.503199	30.5986	0.898003	7.4485	2.73209	3.01503	1.46514		0.870163	0.218265	1.12571	0.663132
0	51.4057	0	0	100.951	5.56447	0.246076	38.3518	4.85663	0.492803	25.2027	0.932315	6.25722	2.36044	2.43354	1.21706		0.883273	0.216484	1.12605	0.660043
1	41.965	0	0	84.6783	4.71439	0.238088	32.6485	3.95141	0.398744	22.6539	0.835499	5.88832	2.28061	2.15929	1.13033		0.875491	0.219454	1.13159	0.643973
1	43.5776	0	0	85.3137	4.79532	0.215053	32.814	4.49725	0.450628	22.1138	0.976394	5.51025	2.12504	2.26356	1.07324		0.879698	0.219976	1.10422	0.669933
7	57.2255	0	0	109.867	6.10151	0.266301	41.2652	5.13594	0.581048	26.6364	0.780349	6.78379	2.56778	2.88069	1.44658		0.886651	0.213127	1.12869	0.665453
7	48.3991	0	0	94.0807	5.3122	0.237747	35.3367	4.59502	0.538754	22.887	0.865643	5.81771	2.12739	2.31482	1.18011		0.885966	0.214697	1.11604	0.672102
14	50.9862	0	0	98.6022	5.3011	0.244256	36.5557	4.83287	0.512222	27.3043	1.01567	6.92796	2.9164	2.83513	1.51844		0.87208	0.212657	1.12506	0.648018
14	69.3859	0	0	131.726	7.43261	0.375472	49.4406	6.34315	0.746907	37.5219	1.48927	9.75668	3.81199	3.89492	1.99907		0.869749	0.212962	1.11896	0.659499
30	50.6526	0	0	97.8804	5.52425	0.263326	35.9941	4.62192	0.51808	30.4089	1.32441	7.13151	2.7769	3.21373	1.66143		0.858521	0.210453	1.1204	0.690647
30	50.6587	0	0	97.5275	5.29031	0.25578	35.1999	4.16605	0.519992	28.7478	1.21115	7.00955	2.94176	3.46769	1.65144		0.864483	0.206003	1.14724	0.682728
91	69.6942	0	0	138.965	8.0873	0.392825	48.4145	5.80035	0.515054	53.0801	2.92966	13.8339	5.63823	5.38165	2.91444		0.828859	0.20131	1.13009	0.665664
91	47.144	0	0	97.3736	5.64508	0.242606	34.5943	4.31363	0.442917	41.8706	1.64393	10.3047	4.699	5.29285	2.90136		0.810525	0.207376	1.12227	0.676759
152	52.2789	0	0	111.46	6.79289	0.336219	42.114	5.58679	0.539945	74.3936	3.14715	15.8509	8.31023	9.4404	5.18156		0.734542	0.220168	1.09361	0.681348
152	48.6305	0	0	103.439	5.89087	0.329137	39.018	4.63987	0.435555	62.3281	3.03386	12.3939	6.26505	7.5099	4.08202		0.754048	0.217871	1.13122	0.700105
	Intact polar-derived lipids (-carry over) ng/g dry weight soil
0	7.18917	0	0	16.4466	0	0	7.17009	0	0	33.6908	2.50375	17.2947	8.25254	9.13507	4.2334		0.477635	0.232751	n.d.	0.657923
0	6.17146	0	0	15.3258	0	0	6.35579	0	0	29.4969	2.31455	16.0255	6.78751	7.73121	3.82		0.485668	0.22819	n.d.	0.671359
1	7.11953	0	0	17.6027	0	0	7.52247	0	0	32.8869	3.21219	18.7334	8.35105	9.30135	4.30163		0.49507	0.233293	n.d.	0.668164
1	3.80501	0	0	8.62621	0	0	3.5155	-0.17038	0	16.7064	1.35434	9.57836	4.03151	4.63087	2.06809		0.488367	0.212034	n.d.	0.666399
7	4.06427	0	0	9.78624	1.09475	0	3.87481	0	0	14.7266	1.12552	9.3957	4.36891	4.82598	1.93081		0.546202	0.205887	n.d.	0.64339
7	3.33926	0	0	7.77067	0	0	3.3602	0	0	13.0731	1.02291	8.00872	3.5629	4.0351	1.85112		0.52536	0.232216	n.d.	0.65977
14	-a	-	-	-	-	-	-	-	-	-	-	-	-	-	-		n.d.	n.d.	n.d.	n.d.
14	-a	-	-	-	-	-	-	-	-	-	-	-	-	-	-		n.d.	n.d.	n.d.	n.d.
30	5.29825	0	0	13.5353	0	0	6.08422	-0.244888	0	24.346	2.14231	13.2662	6.19976	7.47532	3.33515		0.505803	0.23667	n.d.	0.676296
30	6.90979	0	0	16.6891	1.97494	0	6.8453	0	0	26.7695	2.28374	15.178	6.78545	8.02563	3.36568		0.532114	0.21115	n.d.	0.668364
91	10.9129	0	0	26.4496	2.73482	0	11.0312	1.85638	0	47.822	3.63475	21.324	9.50074	11.1585	5.62626		0.502971	0.243231	n.d.	0.682464
91	5.42796	0	0	13.7654	1.77891	0	5.80258	0	0	21.8612	1.54753	12.456	5.79044	6.66122	2.70953		0.53345	0.216718	n.d.	0.653448
152	7.28072	0	0	19.8619	2.2807	0	8.2956	-0.125341	0	27.1085	2.38445	16.2659	8.5329	6.17	4.15042		0.566588	0.217331	n.d.	0.598221
152	6.9867	0	0	18.6331	2.26569	0	8.06871	0	0	34.0071	2.94443	18.7479	9.72654	6.67552	3.89751		0.497646	0.224417	n.d.	0.581546
	a = lost during workup
	n.d. = could not be calculated
